# Supplementary material for: Comparison of Different Fixation Methods for Combined Histological and Biomolecular Analysis of Fixed and Decalcified Bone Samples
Source: MDPI journal article supplement (doi:10.3390/mps5040064), 2022-07-21
Supplement: s1 [file s1]

**Supplementary material S2: Protocol for sample deparaffinization prior to RNA isolation and purification**

- (1) Adding 1 ml of xylene.
- (2) Vortex for 10 sec.
- (3) Incubation for 5 min at 50 °C.
- (4) Centrifugation at 13,300 rpm (max. speed) for 2 min at RT.
- (5) Incubation for 5 min on ice.
- (6) Pipetting off the excess, which contained a thin paraffin layer on the surface, from top to bottom.
- (7) Repeating steps (1)-(6).
- (8) Adding 1 ml of 100% ethanol.
- (9) Vortex for 10 sec.
- (10) Centrifugation at 13,300 rpm (max. speed) for 2 min at RT.
- (11) Pipetting off the excess.
- (12) Repeating steps (8)-(11).
- (13) Air drying under the fume hood for 20 min.
